# Supplementary material for: Engineered biocatalytic architecture for enhanced light utilisation in algal H 2 production
Source: Royal Society of Chemistry journal article supplement (doi:10.1039/d4ee03075c), 2024-12-11
Supplement: d4ee03075c1.xlsx [file d4ee03075c1.xlsx]

## Sheet: Fig 1A data
Synchronised cultures													AVG
													1	2	3	4	5	6	7	8	9	AVG	STD
0	0	0	0	0	0	0	0	0	0	0	0	0	0	0	0	0	0	0	0	0	0	0	0
24.3292	0.000269077	8.67991e-05	0.000456639	0.000454752	0.000315119	0.000447582	0.00042909	0.000207563	0.000326063	0.000475886	0.000162277	0.000223036	0.000321157	0.00470539	0.00472278	0.00477988	0.00072457	0.000857837	0.00514488	0.00562685	0.00758691	0.00383003	0.00255751
47.425		0.00283325	0.00678006	0.00436478	0.00627253	0.00430966	0.00610033	0.00327432	0.00816138	0.00339192	0.0047815	0.0060557	0.00512049	0.046884	0.0474391	0.0601083	0.0159155	0.00829286	0.0138899	0.0132912	0.0163568	0.0252554	0.0203301
71.15			0.0481031	0.0440991	0.0397201	0.0418905	0.0363644	0.0444645	0.0557695	0.0383213	0.042189	0.0318187	0.042274	0.0712313	0.0865595	0.102658	0.0357967	0.0160913	0.0555448	0.0673623	0.044046	0.0579516	0.0268563
95.5833				0.0859379	0.0832691	0.078473	0.0682221	0.0909878	0.111397	0.0717846	0.0818385	0.0696925	0.0824003	0.100607	0.113159	0.138309	0.100534	0.0578339	0.0809094	0.106432	0.0646116	0.0938663	0.0251215
120.892					0.131048	0.120532	0.106047	0.133453	0.148265	0.104739	0.123087	0.101171	0.121043	0.132784	0.149749	0.183046	0.142556	0.100837	0.103889	0.130744	0.0892319	0.128209	0.0287566
143.771						0.140192	0.12877	0.149203	0.175775	0.129543	0.139126	0.113645	0.139465	0.151293	0.162	0.196008	0.182288	0.14722	0.122082	0.145249	0.109142	0.150528	0.0271399
168.946						0.151743	0.147368	0.167029	0.214978	0.143364	0.160869	0.125657	0.158716	0.154114	0.169211	0.206903	0.212869	0.188878	0.142105	0.155112	0.146451	0.170484	0.026193
194.708							0.148036	0.171007	0.218133	0.151604	0.176373	0.146835	0.168665	0.159511	0.171138	0.205429	0.228734	0.213095	0.16127	0.167727	0.178038	0.183734	0.025307
219.108							0.167085	0.178907	0.229171	0.173368	0.160743	0.168915	0.179698	0.164909	0.173065	0.203955	0.236483	0.230198	0.170805	0.16456	0.199656	0.191481	0.0275747
243.129								0.192777	0.249035	0.171226	0.163606	0.169303	0.189189	0.166913	0.191935	0.207646	0.242392	0.237907	0.183037	0.168548	0.225579	0.201461	0.0284631
266.942									0.25067	0.177248	0.16639	0.176667	0.192744	0.170389	0.177188	0.205242	0.254706	0.245233	0.198077	0.177611	0.220811	0.204667	0.030121
Unsynchronised cultures													AVG
													1	2	3	4	5	6	7				STD
0	0	0	0	0	0	0	0	0	0	0	0	0	0	0	0	0	0	0	0			0	0
22.9083	0.00732358	0.00586762	0.00604047	0.00596386	0.00940035	0.00599329	0.00673222	0.0124206	0.0122515	0.00934298	0.0132576	0.0120802	0.00888952	0.000128265	0.000103612	0.000850334	0.00298081	0.00489728	0.00682018			0.00352429	0.00346923
45.9		0.0190587	0.0185338	0.0193284	0.0093899	0.0167434	0.0216047	0.0186478	0.0158973	0.0217296	0.0182723	0.0131458	0.0174865	0.00501836	0.00606478	0.00444848	0.00856782	0.0192396	0.0264343			0.0124657	0.00858408
69.125			0.050294	0.0390644	0.0254394	0.0592589	0.0351479	0.0328254	0.0471579	0.0343194	0.0373301	0.0383199	0.0399157	0.00865607	0.0101021	0.00596754	0.0502057	0.0633896	0.0603332			0.0340814	0.0253443
93.8208				0.0489098	0.06089	0.099459	0.040716	0.0440909	0.0887538	0.0512239	0.067225	0.0728903	0.0637954	0.0417683	0.0394431	0.0277298	0.0911261	0.0925847	0.0805156			0.0624233	0.026524
119.65					0.102948	0.129113	0.0477319	0.0568389	0.123286	0.0701318	0.0881613	0.106132	0.0905429	0.0760788	0.0669859	0.058084	0.130633	0.116718	0.0930938			0.0903052	0.0261922
142.538						0.0631022	0.0769858	0.131287	0.136646	0.0989548	0.09908	0.12281	0.104124	0.107565	0.0955706	0.0943805	0.146058	0.120371	0.0952786			0.10905	0.0187563
167.054						0.0818286	0.096124	0.158727	0.151456	0.113456	0.114011	0.137407	0.121858	0.130984	0.112126	0.126304	0.164917	0.132178	0.0963686			0.126391	0.0210723
192.912							0.0986929	0.162729	0.16952	0.116391	0.114635	0.151275	0.135541	0.152282	0.129296	0.149518	0.169932	0.133976	0.105672			0.139459	0.0203488
217.717							0.104227	0.172705	0.17443	0.113399	0.119688	0.153232	0.139613	0.166046	0.145305	0.163114	0.168083	0.15838	0.110498			0.150148	0.0204812
241.708								0.176761	0.169782	0.107669	0.126385	0.151945	0.146509	0.173364	0.159577	0.173875	0.185657	0.169285	0.120409			0.161239	0.0218115
266.142									0.180741	0.117275	0.127593	0.150443	0.144013	0.17568	0.165959	0.17658	0.194665	0.182475	0.132839			0.167459	0.0218592

## Sheet: Fig 2B data
Unsynchronised cultures
	Wt/Wt film						Tla2/Wt film						Tla2/Tla2 film
	1	2	3	AVG	STD		1	2	3	AVG	STD		1	2	3	AVG	STD
0	0	0	0	0	0		0	0	0	0	0		0	0	0	0	0
19	0.000811987	0.00063977	0.000512874	0.000654877	0.000150128		0.00094115	0.000771954	0.000880723	0.000864609	8.5741e-05		0.000980427	0.000971363	0.00113074	0.00102751	8.95141e-05
43	0.002712	0.00235481	0.00161793	0.00222825	0.000557906		0.00254349	0.00198063	0.00242501	0.00231638	0.000296735		0.00671227	0.00251145	0.00274565	0.00398979	0.00236064
67	0.00575051	0.00587722	0.00759378	0.00640717	0.00102958		0.00788763	0.00758048	0.00777355	0.00774722	0.000155259		0.0116889	0.0110916	0.00980767	0.0108628	0.000961297
90	0.0127432	0.0102787	0.0267669	0.0165963	0.00889378		0.0264248	0.0248462	0.0271427	0.0261379	0.0011748		0.0245313	0.0258721	0.0228308	0.0244114	0.00152418
111.5	0.0269064	0.0224509	0.0579211	0.0357595	0.0193214		0.0577471	0.0594165	0.0590968	0.0587535	0.000886047		0.0373667	0.0404321	0.0373246	0.0383745	0.00178208
118.5	0.0342645	0.0297463	0.065368	0.0431263	0.0193939		0.0676743	0.068889	0.0701006	0.068888	0.00121313		0.0420119	0.045141	0.0413075	0.0428201	0.00204056
140.5	0.053356	0.0588549	0.0923981	0.068203	0.0211332		0.0963934	0.102017	0.101017	0.0998091	0.00300002		0.054775	0.0580676	0.0544964	0.0557797	0.00198627
164.5	0.0782207	0.0963017	0.113311	0.0959444	0.0175477		0.128999	0.13742	0.126596	0.131005	0.00568411		0.0661997	0.072816	0.06823	0.0690819	0.00338943
188.5	0.0999596	0.129193	0.139981	0.123044	0.0207068		0.158268	0.162583	0.157072	0.159308	0.0028992		0.0787295	0.0857186	0.0781324	0.0808602	0.00421808
211.5	0.11923	0.156569	0.152549	0.142783	0.0204957		0.173621	0.186604	0.173477	0.177901	0.0075375		0.083046	0.0991641	0.0895437	0.0905846	0.00810928
237	0.138987	0.182635	0.159466	0.160363	0.0218375		0.199376	0.204279	0.185179	0.196278	0.00991993		0.101811	0.113143	0.0990417	0.104665	0.00747133
265	0.151112	0.202506	0.162576	0.172065	0.0269791		0.220046	0.21676	0.200289	0.212365	0.0105867		0.108839	0.123334	0.104726	0.1123	0.00977456

## Sheet: Fig 2C data
Synchronised cultures
	Wt/Wt film						Tla2/Wt film						Tla2/Tla2 film
Time, h	1	2	3	AVG	STD		1	2	3	AVG	STD		1	2	3	AVG	STD
0	0	0	0	0	0		0	0	0	0	0		0	0	0	0	0
26	0.00461124	0.00470993	0.00440743	0.0045762	0.000154264		0.00763283	0.00579212	0.00735567	0.00692687	0.000992449		0.00936124	0.00777388	0.00665047	0.00792853	0.00136199
48.5	0.0260841	0.0307498	0.0257579	0.0275306	0.0027927		0.0641517	0.0493948	0.040757	0.0514345	0.01183		0.0600494	0.0582783	0.0552036	0.0578438	0.00245195
64.5	0.0729555	0.0709309	0.0742483	0.0727116	0.00167209		0.130557	0.0978883	0.0921604	0.106869	0.0207137		0.0980938	0.101559	0.101339	0.100331	0.00194028
77	0.107906	0.10356	0.121886	0.111118	0.00957562		0.180678	0.137721	0.135226	0.151208	0.0255517		0.130276	0.132816	0.133881	0.132324	0.00185181
95.5	0.169692	0.158236	0.187176	0.171701	0.0145744		0.258417	0.204348	0.207335	0.223367	0.0303914		0.174312	0.16439	0.164857	0.167853	0.00559811
116.5	0.195686	0.216546	0.244586	0.218939	0.0245374		0.329918	0.288139	0.277507	0.298521	0.0277052		0.222947	0.21132	0.185417	0.206562	0.0192122
142	0.217579	0.274279	0.292171	0.261343	0.0389424		0.355467	0.339565	0.336041	0.343691	0.0103498		0.252311	0.257066	0.232951	0.247442	0.0127733
165.5	0.229645	0.305641	0.327958	0.287748	0.0515408		0.392707	0.379829	0.351531	0.374689	0.0210637		0.279328	0.280141	0.256485	0.271984	0.0134294
196	0.236663	0.322857	0.36147	0.306997	0.0638972		0.427858	0.394968	0.390898	0.404575	0.0202663		0.306787	0.32367	0.2786	0.303019	0.0227704
218	0.239767	0.326382	0.364075	0.310075	0.0637381		0.430906	0.415695	0.396894	0.414498	0.0170376		0.336338	0.326308	0.328523	0.33039	0.0052689
241	0.248472	0.321908	0.393157	0.321179	0.072345		0.444162	0.427389	0.413098	0.428216	0.0155489		0.353171	0.340521	0.310884	0.334858	0.0217044
264	0.257177	0.317435	0.422239	0.332284	0.0835264		0.457419	0.439082	0.429301	0.441934	0.0142741		0.370003	0.354733	0.293245	0.339327	0.0406321

## Sheet: Fig 3A data
Wt/Wt film
Time, h	1	2	3	Time, h	4	5	6	Time, h	7	8	9	Time, h	10	11	12		Time, h	AVG	STD
0	0	0	0	0	0	0	0	0	0	0	0	0	0	0	0		0	0	0
22.0333	0.0169738	0.0154207	0.013043	23.8333	0.00754689	0.00861124	0.00566401	24.2667	0.00749366	0.0078613	0.00836543	24.5167	0.0145339	0.0169213	0.0145568		23.6625	0.011416	0.00418566
46.1833	0.0429989	0.0370963	0.0281188	50.1	0.0354796	0.0391576	0.0323541	45.7667	0.0273942	0.0331534	0.0344559	48.2	0.0387359	0.0451096	0.0399693		47.5625	0.0361686	0.00544615
72.0333	0.111972	0.105853	0.0865611	72.0333	0.0962037	0.107058	0.090815	73.55	0.0797353	0.0905301	0.0822525	70.2167	0.0938415	0.11056	0.103383		71.9583	0.0965638	0.0110424
97.7833	0.184793	0.173491	0.153796	96.4	0.172076	0.199476	0.168854	100.6	0.139441	0.150431	0.137094	95	0.159439	0.185928	0.178126		97.4458	0.166912	0.0192696
121.367	0.238689	0.226761	0.208881	120.417	0.24034	0.269612	0.235376	121.9	0.176301	0.189282	0.167157	120.517	0.221362	0.251191	0.238368		121.05	0.221943	0.0309582
141.95	0.268685	0.263572	0.242157	143.517	0.279676	0.313546	0.286473	144.917	0.202358	0.208668	0.184703	144.7	0.267015	0.30338	0.286835		143.771	0.258922	0.0411496
166.817	0.312872	0.302463	0.282225	167.533	0.313347	0.331164	0.314264	168.083	0.222881	0.233186	0.208778	168.883	0.301154	0.341114	0.318443		167.829	0.290158	0.0441512
190.917	0.350742	0.338326	0.290477	191.15	0.325314	0.34446	0.33128	194	0.247825	0.251666	0.218998	195.883	0.335314	0.374531	0.346329		192.987	0.312938	0.048887
216.617	0.374098	0.371502	0.295098	216	0.346274	0.354911	0.343233	217.533	0.261139	0.25994	0.228133	218.867	0.357385	0.400128	0.357856		217.254	0.329141	0.0542787
241.033	0.404795	0.394627	0.301052	240.217	0.367235	0.365363	0.355186	239.317	0.272704	0.267659	0.229409	242.4	0.380211	0.408093	0.365202		240.742	0.342628	0.0596302
264.983	0.422786	0.418403	0.295253	266.533	0.381209	0.384269	0.374161	269.633	0.278754	0.281274	0.247111	265.467	0.386739	0.427225	0.384522		266.654	0.356809	0.0632748
289.083	0.453379	0.411184	0.301448	288.533	0.39432	0.398498	0.385154	292.483	0.28558	0.29198	0.249727	291.133	0.396482	0.431878	0.381726		290.308	0.365113	0.0653947
312.233	0.457114	0.446318	0.297471	312.867	0.39934	0.418053	0.402743	314.267	0.290483	0.302519	0.259207	312.2	0.394936	0.440222	0.378444		312.892	0.373904	0.0684297
336.2	0.431378	0.48207	0.314677	336.983	0.410647	0.43002	0.398284	335.783	0.292538	0.31042	0.261359	336.583	0.398936	0.442846	0.368367		336.388	0.378462	0.0688096
360.617	0.460174	0.455992	0.309188	361.5	0.416626	0.435792	0.418416	360.133	0.293562	0.314475	0.263392	360.533	0.401621	0.449988	0.357572		360.696	0.3814	0.0702947
384.817	0.467406	0.531781	0.312103	384.983	0.406112	0.431033	0.403077	384.5	0.296383	0.315905	0.269257	387.883	0.399744	0.437098	0.361008		385.546	0.385909	0.0774959
Tla2/Wt film
Time, h	1	2	3	Time, h	4	5	6	Time, h	7	8	9	Time, h	10	11	12		Time, h	AVG	STD
0	0	0	0	0	0	0	0	0	0	0	0	0	0	0	0		0	0	0
22.1667	0.0234871	0.0312701	0.0294233	24.0167	0.0239226	0.0231737	0.0205713	24.4167	0.0301279	0.0289746	0.022989	24.65	0.0466308	0.0428547	0.0374819		23.8125	0.0300756	0.00833806
46.3	0.0616068	0.0792593	0.077319	50.2333	0.0619513	0.064345	0.065051	45.9167	0.0668623	0.0631723	0.0546572	48.3333	0.0921574	0.0855359	0.0766078		47.6958	0.0707105	0.0112524
72.15	0.122809	0.149563	0.158169	72.1833	0.123123	0.138548	0.131595	73.7167	0.143274	0.137244	0.126743	70.35	0.143167	0.141475	0.127494		72.1	0.136934	0.0109732
97.9	0.193035	0.224825	0.251414	96.5833	0.194677	0.220931	0.213076	100.717	0.21848	0.21411	0.201172	95.1333	0.212777	0.217141	0.20059		97.5833	0.213519	0.0158166
121.6	0.257822	0.295005	0.324289	120.55	0.275455	0.30868	0.30303	122.017	0.275133	0.27224	0.257755	120.65	0.269367	0.28958	0.266972		121.204	0.282944	0.0211089
142.1	0.316681	0.352126	0.388268	143.65	0.340022	0.378363	0.358249	145.25	0.331283	0.314037	0.310991	144.817	0.325543	0.345773	0.316846		143.954	0.339848	0.0255754
166.983	0.38169	0.403132	0.459655	167.75	0.396752	0.443367	0.416691	168.217	0.375247	0.366792	0.360403	169.267	0.363685	0.396362	0.35403		168.054	0.393151	0.0333566
191.05	0.435418	0.474723	0.523787	191.333	0.458687	0.515892	0.491738	194.25	0.42455	0.412154	0.407123	196	0.414229	0.458965	0.404432		193.158	0.451808	0.0423656
216.8	0.488905	0.514597	0.546048	216	0.502586	0.55017	0.535623	217.7	0.430006	0.44842	0.447832	219.033	0.441017	0.490965	0.443417		217.383	0.486632	0.0438471
241.117	0.540404	0.564367	0.62087	240.617	0.546484	0.584447	0.579508	239.4	0.427949	0.482186	0.476236	242.717	0.478426	0.512931	0.46088		240.962	0.522891	0.0587346
265.15	0.58568	0.620391	0.664599	266.767	0.610407	0.651468	0.626314	269.917	0.465143	0.499045	0.502892	265.617	0.498083	0.527802	0.474429		266.862	0.560521	0.0730606
289.333	0.641169	0.653369	0.701871	288.767	0.642168	0.687802	0.678427	292.667	0.466006	0.50002	0.518611	291.3	0.516533	0.553808	0.484609		290.517	0.587033	0.0881792
312.467	0.674486	0.674942	0.719259	313	0.692745	0.739845	0.728069	314.417	0.476999	0.516904	0.523324	312.333	0.516503	0.548011	0.488044		313.054	0.608261	0.10412
336.317	0.704497	0.717413	0.763072	337.117	0.719909	0.761128	0.742323	335.983	0.480463	0.512257	0.534243	336.717	0.531847	0.563413	0.498398		336.533	0.627414	0.115008
360.917	0.738508	0.718966	0.779868	361.633	0.72112	0.777411	0.773699	360.45	0.502051	0.539274	0.558528	360.65	0.543817	0.564262	0.497801		360.912	0.642942	0.11668
385.35	0.741777	0.74622	0.780257	385.267	0.764823	0.785051	0.777412	384.833	0.502021	0.536209	0.570394	388.033	0.554163	0.562877	0.504618		385.871	0.652152	0.12111
Tla2/Tla2 film
Time, h	1	2	3	Time, h	4	5	6	Time, h	7	8	9	Time, h	10	11	12		Time, h	AVG	STD
0	0	0	0	0	0	0	0	0	0	0	0	0	0	0	0		0	0	0
21.6333	0.0357594	0.0310147	0.0302619	22.45	0.0160413	0.0184555	0.0185083	23.5167	0.01989	0.0255232	0.0224606	24.7833	0.0361996	0.0377523	0.0350545		23.0958	0.0272434	0.00801387
45.7333	0.0830818	0.0753521	0.0710022	48.6667	0.0434922	0.0529054	0.0529791	45.1	0.0416077	0.0500794	0.0473126	48.4667	0.0719314	0.075562	0.0720168		46.9917	0.0614436	0.0146574
71.8333	0.139415	0.127169	0.133444	70.8833	0.0758861	0.093783	0.0928106	72.85	0.084716	0.096008	0.0911239	70.5333	0.110181	0.113532	0.112523		71.525	0.105883	0.0200876
97.4	0.201621	0.201857	0.205452	95.0833	0.117257	0.142648	0.136701	99.8667	0.139387	0.162303	0.149651	95.3167	0.154127	0.15816	0.158058		96.9167	0.160602	0.0282772
121.117	0.256376	0.266832	0.278849	119.05	0.156305	0.17563	0.17381	121.15	0.179655	0.20828	0.191931	120.783	0.202947	0.208485	0.20597		120.525	0.208756	0.0390743
141.65	0.304265	0.31523	0.318579	142.1	0.195225	0.203433	0.201643	144.433	0.221171	0.253275	0.221553	144.933	0.235975	0.252073	0.245059		143.279	0.24729	0.0438987
166.517	0.361842	0.359069	0.392403	166.217	0.229977	0.234235	0.234492	167.333	0.259396	0.290678	0.259592	169.4	0.267194	0.2843	0.278253		167.367	0.287619	0.0545195
190.567	0.412622	0.438303	0.42616	189.833	0.263034	0.261075	0.254343	193.367	0.282029	0.311207	0.284435	196.15	0.296491	0.315016	0.30864		192.479	0.321113	0.066297
216.333	0.461366	0.470359	0.490874	216	0.286917	0.280852	0.282304	217.1	0.296151	0.318871	0.305312	219.167	0.329353	0.339711	0.334664		217.15	0.349728	0.0778752
240.65	0.511786	0.516151	0.519613	239.233	0.310799	0.300629	0.310266	238.517	0.305759	0.33248	0.326182	242.833	0.338909	0.353542	0.349475		240.308	0.372966	0.0877708
264.7	0.557381	0.566418	0.565236	265.217	0.350368	0.318058	0.334027	269.117	0.30657	0.360225	0.337555	265.75	0.365002	0.363478	0.361025		266.196	0.398779	0.10071
288.8	0.573029	0.593013	0.570231	287.45	0.362109	0.352474	0.366082	291.917	0.306354	0.372837	0.358261	291.417	0.384926	0.372206	0.387966		289.896	0.416624	0.100043
312.15	0.600918	0.619735	0.586136	311.483	0.368355	0.374287	0.391907	313.6	0.315901	0.390677	0.374529	312.45	0.402096	0.374332	0.384133		312.421	0.431917	0.105108
335.8	0.638952	0.658402	0.593592	335.833	0.394691	0.394038	0.425617	335.133	0.308557	0.382913	0.363841	337.067	0.417045	0.381641	0.395418		335.958	0.446226	0.115615
360.917	0.674372	0.658139	0.567481	360.267	0.409667	0.41274	0.4554	359.717	0.300132	0.391597	0.355754	360.9	0.420543	0.377505	0.395938		360.45	0.451606	0.118429
384.85	0.694059	0.677607	0.608174	384.767	0.431103	0.43336	0.469102	383.967	0.3074	0.399219	0.386225	388.2	0.436739	0.37933	0.400865		385.446	0.468598	0.12351

## Sheet: Fig 3B data
Max. efficiency
#	Wt/Wt film	AVG	STD		Tla2/Wt film	AVG	STD		Tla2/Tla2 film	AVG	STD
1	3.4338	3.32701	0.522488		3.5065	3.77792	0.4306		2.95708	2.67136	0.539066
2	3.21017				3.64871				3.55045
3	3.16409				4.10376				3.77437
4	3.77787				4.11006				2.06555
5	4.08277				4.47023				2.44492
6	3.88493				4.58169				2.19501
7	2.67191				3.38815				2.44962
8	2.68284				3.46221				2.97534
9	2.45377				3.35021				2.62438
10	3.20872				3.41561				2.33
11	3.69277				3.71357				2.40257
12	3.66044				3.5844				2.28705
AVG Efficiency
#	Wt/Wt film	AVG	STD		Tla2/Wt film	AVG	STD		Tla2/Tla2 film	AVG	STD
1	1.48959	1.22513	0.2483		2.37238	2.08096	0.393442		2.22107	1.49174	0.399116
2	1.69709				2.38674				2.16787
3	0.990353				2.49679				1.94349
4	1.29175				2.44741				1.37288
5	1.37189				2.51284				1.38015
6	1.28199				2.48813				1.49525
7	0.940723				1.60106				0.977429
8	1.00337				1.71129				1.27295
9	0.853743				1.8216				1.23108
10	1.26177				1.75463				1.37872
11	1.38099				1.78252				1.19568
12	1.13826				1.59615				1.26431

## Sheet: Suppl Fig 1 data
Synchronised, submerged
Time, h		1	2		Time, h	3	4	5		Time, h	AVG	STD
0		0	0		0	0	0	0		0	0	0
23.9833		0.00072457	0.000857837		23.8333	0.00514488	0.00562685	0.00758691		23.9083	0.00398821	0.00305877
46.6833		0.0159155	0.00829286		48.0167	0.0138899	0.0132912	0.0163568		47.35	0.0135493	0.00321302
61.4667		0.0357967	0.0160913		74.6333	0.0555448	0.0673623	0.044046		68.05	0.0437682	0.0195256
92.85		0.100534	0.0578339		94.9833	0.0809094	0.106432	0.0646116		93.9167	0.0820641	0.0213771
115.5		0.142556	0.100837		119.067	0.103889	0.130744	0.0892319		117.283	0.113452	0.022267
139.367		0.182288	0.14722		142.717	0.122082	0.145249	0.109142		141.042	0.141196	0.0279915
165.617		0.212869	0.188878		166.167	0.142105	0.155112	0.146451		165.892	0.169083	0.0305952
193.25		0.228734	0.213095		194.083	0.16127	0.167727	0.178038		193.667	0.189773	0.0295722
217.483		0.236483	0.230198		221.95	0.170805	0.16456	0.199656		219.717	0.200341	0.0329803
240.65		0.242392	0.237907		245.367	0.183037	0.168548	0.225579		243.008	0.211492	0.0335593
265.25		0.254706	0.245233		266.517	0.198077	0.177611	0.220811		265.883	0.219288	0.0320812
293.4		0.251503	0.252914		287.467	0.202508	0.179722	0.234454		290.433	0.22422	0.0321087
317		0.257685	0.255915		315.1	0.228939	0.183568	0.234466		316.05	0.232114	0.0299695
Unsynchronised, submerged
Time, h	1	2	3		Time, h	4	5	6		Time, h	AVG	STD
0	0	0	0		0	0	0	0		0	0	0
24.1667	0.000128265	0.000103612	0.000850334		23.9667	0.00298081	0.00489728	0.00682018		24.0667	0.00263008	0.00277956
46.85	0.00501836	0.00606478	0.00444848		48.25	0.00856782	0.0192396	0.0264343		47.55	0.0116289	0.00908525
61.65	0.00865607	0.0101021	0.00596754		74.85	0.0502057	0.0633896	0.0603332		68.25	0.033109	0.0276199
93.0667	0.0417683	0.0394431	0.0277298		95.2167	0.0911261	0.0925847	0.0805156		94.1417	0.0621946	0.029048
115.6	0.0760788	0.0669859	0.058084		119.5	0.130633	0.116718	0.0930938		117.55	0.0902656	0.0286919
139.65	0.107565	0.0955706	0.0943805		143	0.146058	0.120371	0.0952786		141.325	0.109871	0.0204083
165.9	0.130984	0.112126	0.126304		166.317	0.164917	0.132178	0.0963686		166.108	0.127147	0.0229795
193.467	0.152282	0.129296	0.149518		194.183	0.169932	0.133976	0.105672		193.825	0.140113	0.0222104
217.717	0.166046	0.145305	0.163114		222.15	0.168083	0.15838	0.110498		219.933	0.151904	0.0218513
240.8	0.173364	0.159577	0.173875		245.533	0.185657	0.169285	0.120409		243.167	0.163694	0.0228092
265.383	0.17568	0.165959	0.17658		266.683	0.194665	0.182475	0.132839		266.033	0.171366	0.021098
293.683	0.18238	0.182612	0.170767		287.767	0.200182	0.186647	0.142677		290.725	0.177544	0.0195246
316.7	0.188377	0.183386	0.171109		315.8	0.209359	0.191487	0.16658		316.25	0.18505	0.0153734
Synchronised, semi-wet
Time, h	1	2	3		Time, h	4	5	6		Time, h	AVG	STD
0	0	0	0		0	0	0	0		0	0	0
23.9833	0.00361571	0.00185966	0.00169138		23.6333	0.0259706	0.0282139	0.0226371		23.8083	0.0139981	0.0128581
46.6833	0.0398703	0.037923	0.0398595		47.95	0.0439192	0.0439472	0.0345823		47.3167	0.0400169	0.00359556
61.4667	0.0648497	0.0676518	0.0699964		74.4833	0.129677	0.118181	0.118392		67.975	0.0947912	0.0302289
92.85	0.119785	0.145484	0.153311		95.0833	0.210411	0.194431	0.199608		93.9667	0.170505	0.0360726
115.5	0.16112	0.182285	0.191344		119.217	0.274228	0.249705	0.259081		117.358	0.219627	0.0470319
139.5	0.204572	0.214153	0.22073		143.383	0.321851	0.266161	0.296928		141.442	0.254066	0.0484403
165.583	0.24402	0.231301	0.235801		166.017	0.354741	0.298501	0.339904		165.8	0.284045	0.0548428
193.25	0.276063	0.245681	0.248784		193.917	0.377492	0.321464	0.380285		193.583	0.308295	0.0610658
217.367	0.289481	0.255958	0.26069		221.95	0.396634	0.34864	0.406369		219.658	0.326295	0.0670303
240.5	0.290286	0.269731	0.277191		245.25	0.415183	0.357796	0.425485		242.875	0.339279	0.0701826
265.4	0.291971	0.276273	0.271247		266.333	0.439506	0.364006	0.428458		265.867	0.345243	0.0764624
293.35	0.286654	0.29094	0.282776		287.633	0.444756	0.387611	0.455353		290.492	0.358015	0.0813964
316.667	0.286641	0.290976	0.282804		314.917	0.458296	0.390231	0.444678		315.792	0.358938	0.0822734
Unsynchronised, semi-wet
Time, h	1	2	3		Time, h	4	5	6		Time, h	AVG	STD
0	0	0	0		0	0	0	0		0	0	0
23.9833	0.00208796	0.00100218	0.000773875		23.8	0.0285133	0.029413	0.029413		23.8917	0.0152006	0.0152504
46.6833	0.0276578	0.0173754	0.0189529		48.2	0.0569556	0.0637247	0.0701197		47.4417	0.0424643	0.0237836
61.4667	0.048284	0.0304632	0.035186		74.7	0.0979241	0.0930449	0.108392		68.0833	0.0688824	0.0347104
92.85	0.0985006	0.0760649	0.0622853		95.6167	0.12968	0.129671	0.140486		94.2333	0.106115	0.0321669
115.5	0.133757	0.106524	0.0837755		119.5	0.164108	0.15596	0.160305		117.5	0.134072	0.0327358
139.767	0.159838	0.128486	0.0981413		143.5	0.178925	0.176033	0.160615		141.633	0.15034	0.031226
165.783	0.180436	0.14728	0.11073		166.017	0.200292	0.200402	0.187099		165.9	0.17104	0.0354
193.433	0.191007	0.158158	0.119517		194.25	0.20911	0.201616	0.193992		193.842	0.1789	0.03394
217.533	0.206537	0.165633	0.125385		222.133	0.214873	0.211546	0.194045		219.833	0.186337	0.0348167
240.667	0.214976	0.168785	0.126819		245.417	0.222903	0.215611	0.20332		243.042	0.192069	0.0372988
265.567	0.211282	0.166142	0.128242		266.483	0.230208	0.220093	0.206331		266.025	0.193716	0.038839
293.55	0.21586	0.167741	0.130864		288.017	0.232069	0.231101	0.207956		290.783	0.197598	0.0402403
316.883	0.209694	0.172509	0.128021		315.083	0.238027	0.240329	0.214866		315.983	0.200574	0.0431791

## Sheet: Suppl Fig 2 data
Alginate film
Time, h	1	2	3		AVG	STD
0	0	0	0		0	0
21.3333	0.026996	0.0247265	0.0328586		0.0281937	0.00419628
48.5	0.0626448	0.0564543	0.0827596		0.0672862	0.0137532
72.7167	0.0891672	0.0893346	0.120448		0.0996498	0.0180117
100.817	0.123448	0.126479	0.163609		0.137845	0.0223632
136.583	0.167037	0.17013	0.213479		0.183548	0.0259666
163.45	0.196612	0.198251	0.251953		0.215605	0.0314886
192.283	0.22336	0.219646	0.290418		0.244474	0.0398315
217.383	0.237455	0.237176	0.312616		0.262416	0.0434749
237.917	0.259255	0.245333	0.333125		0.279238	0.0471844
288.55	0.291951	0.258471	0.37074		0.307054	0.0576381
313.267	0.302107	0.264272	0.392169		0.319516	0.065702
337.383	0.315342	0.266325	0.382093		0.321253	0.0581099
TCNF film
Time, h	1	2	3		AVG	STD
0	0	0	0		0	0
21.5333	0.0148894	0.0163975	0.0144521		0.0152463	0.00102064
48.8667	0.0439127	0.044392	0.0423253		0.0435433	0.00108171
72.8667	0.0700355	0.0738514	0.0712257		0.0717042	0.00195243
100.967	0.101287	0.106602	0.107848		0.105246	0.00348427
136.733	0.141136	0.146539	0.15558		0.147752	0.00729797
163.633	0.1715	0.176887	0.186527		0.178304	0.00761331
192.617	0.195827	0.206284	0.230441		0.21085	0.0177535
217.633	0.202149	0.220808	0.266191		0.229716	0.0329369
238.167	0.230245	0.247398	0.281725		0.253123	0.0262132
288.55	0.253989	0.28999	0.331975		0.291985	0.0390314
313.433	0.267238	0.308223	0.354529		0.309997	0.0436726
337.5	0.278212	0.32601	0.379443		0.327889	0.0506416

## Sheet: Suppl Fig 3A data
Wt/Wt film
Time, h	1	2	3	Time, h	4	5	6	Time, h	7	8	9		Time, h	AVG	STD
0	0	0	0	0	0	0	0	0	0	0	0		0	0	0
22.0333	0.0169738	0.0154207	0.013043	23.8333	0.00754689	0.00861124	0.00566401	24.2667	0.00749366	0.0078613	0.00836543		23.3778	0.0101089	0.00399133
46.1833	0.0429989	0.0370963	0.0281188	50.1	0.0354796	0.0391576	0.0323541	45.7667	0.0273942	0.0331534	0.0344559		47.35	0.0344676	0.0049906
72.0333	0.111972	0.105853	0.0865611	72.0333	0.0954895	0.105695	0.0901787	73.55	0.0797353	0.0905301	0.0822525		72.5389	0.0942519	0.0113213
97.7833	0.184793	0.173491	0.153796	96.4	0.172076	0.199472	0.168854	100.6	0.139441	0.150431	0.137094		98.2611	0.164383	0.0208671
121.367	0.238689	0.226761	0.208881	120.417	0.24034	0.269612	0.235376	121.9	0.176301	0.189282	0.167157		121.228	0.216933	0.0338951
141.95	0.268685	0.263572	0.242157	143.517	0.279676	0.313546	0.286473	144.917	0.202358	0.208668	0.184703		143.461	0.249982	0.0434249
166.817	0.312872	0.302463	0.282225	167.533	0.313347	0.331164	0.314264	168.083	0.222881	0.233186	0.208778		167.478	0.280131	0.0461253
190.917	0.350742	0.338326	0.290477	191.15	0.325314	0.34446	0.33128	194	0.247825	0.251666	0.218998		192.022	0.299898	0.0491806
216.617	0.374098	0.371502	0.295098	216	0.346274	0.354911	0.343233	217.533	0.261139	0.25994	0.228133		216.717	0.314925	0.0546897
241.033	0.404795	0.394627	0.301052	240.217	0.367235	0.365363	0.355186	239.317	0.272704	0.267659	0.229409		240.189	0.32867	0.0624021
264.983	0.422786	0.418403	0.295253	266.533	0.381209	0.384269	0.374161	269.633	0.278754	0.281274	0.247111		267.05	0.34258	0.0667047
289.083	0.453379	0.411184	0.301448	288.533	0.39432	0.398498	0.385154	292.483	0.28558	0.29198	0.249727		290.033	0.352363	0.0705874
312.233	0.457114	0.446318	0.297471	312.867	0.39934	0.418053	0.402743	314.267	0.290483	0.302519	0.259207		313.122	0.363694	0.0755891
336.2	0.431378	0.48207	0.314677	336.983	0.410647	0.43002	0.398284	335.783	0.292538	0.31042	0.261359		336.322	0.370155	0.0764811
Tla5/Tla2/Wt film
Time, h	1	2	3	Time, h	4	5	6	Time, h	7	8	9		Time, h	AVG	STD
0	0	0	0	0	0	0	0	0	0	0	0		0	0	0
21.7667	0.020542	0.0253407	0.0268077	22.6167	0.0212165	0.0181157	0.0229419	23.6667	0.0320783	0.0325682	0.0313845		22.6833	0.0256662	0.0054008
45.9	0.0519558	0.0639294	0.0645322	45.8	0.045765	0.048511	0.0539832	45.2667	0.0580422	0.0573846	0.0560955		45.6556	0.0555777	0.00633866
71.9667	0.0980834	0.110704	0.108122	70.9833	0.0781164	0.0805456	0.0938053	73.0833	0.0892373	0.0921843	0.0897985		72.0111	0.0933996	0.0110049
97.5833	0.14553	0.161883	0.153344	95.2333	0.114683	0.11813	0.135437	100.033	0.114367	0.123021	0.118808		97.6167	0.131689	0.0180291
121.3	0.189123	0.204254	0.200648	119.217	0.141361	0.150073	0.169797	121.333	0.137547	0.144692	0.135734		120.617	0.163692	0.027851
141.9	0.230233	0.23985	0.239794	142.35	0.172713	0.181911	0.197601	144.617	0.151466	0.167082	0.157766		142.956	0.193157	0.0352926
166.8	0.262534	0.281289	0.280077	166.367	0.200086	0.207368	0.223089	167.483	0.177122	0.188315	0.178897		166.883	0.222086	0.0421799
190.783	0.303294	0.314707	0.320323	190.05	0.219449	0.226696	0.239699	193.533	0.189774	0.203821	0.18799		191.456	0.245084	0.0535519
216.5	0.344254	0.359948	0.351622	216	0.234652	0.246733	0.259917	217.267	0.208	0.205974	0.18802		216.589	0.266569	0.0677469
240.833	0.367389	0.392511	0.37565	239.433	0.249855	0.266769	0.280136	238.667	0.219505	0.210494	0.205005		239.644	0.285257	0.0744938
264.883	0.389963	0.431379	0.393377	265.417	0.281363	0.294432	0.30888	269.3	0.249008	0.225147	0.211759		266.533	0.309479	0.0788283
289.017	0.411554	0.465667	0.434962	287.65	0.293263	0.334109	0.339966	292.3	0.257017	0.232227	0.213985		289.656	0.331417	0.090738
313	0.443307	0.490751	0.457279	311.8	0.322252	0.35841	0.357541	313.817	0.271884	0.234526	0.232126		312.872	0.352008	0.0963183
336.567	0.454589	0.504497	0.471721	336.133	0.333454	0.355629	0.371586	335.383	0.268483	0.241926	0.23603		336.028	0.359769	0.10053
Tla3/Tla2/Wt film
Time, h	1	2	3		Time, h	AVG	STD
0	0	0	0		0	0	0
21.4667	0.018177	0.0156418	0.0179562		21.4667	0.0172583	0.00140431
43.9667	0.0416687	0.0390994	0.0477095		43.9667	0.0428259	0.00442012
68.4	0.0661331	0.0628686	0.0628036		68.4	0.0639351	0.00190378
96.8333	0.089086	0.0993446	0.117439		96.8333	0.101956	0.0143556
117.233	0.108014	0.123748	0.149541		117.233	0.127101	0.0209658
145.8	0.136908	0.171085	0.195073		145.8	0.167688	0.0292309
167.2	0.159052	0.178292	0.21968		167.2	0.185675	0.0309807
192.667	0.181429	0.229109	0.255647		192.667	0.222062	0.0376073
216.717	0.204101	0.256057	0.267395		216.717	0.242517	0.0337493
237.15	0.20689	0.260144	0.282378		237.15	0.249804	0.0387915
261.8	0.219482	0.278846	0.289965		261.8	0.262764	0.0378937
291.817	0.225608	0.291943	0.296356		291.817	0.271302	0.0396335

## Sheet: Suppl Fig 3B data
Wt/Wt film
Time, h					AVG	STD
0	0	0	0		0	0
30.15	0.00586123	0.00359534	0.00652542		0.00532733	0.00153627
48.75	0.0258481	0.0263385	0.0266043		0.0262636	0.000383619
74.0667	0.0405175	0.0435121	0.0424973		0.0421756	0.00152296
99.7167	0.0472003	0.0559715	0.0481752		0.050449	0.00480738
123.867	0.0512832	0.0607031	0.0513438		0.0544434	0.00542114
142.217	0.0506701	0.0619762	0.0505677		0.0544047	0.00655733
174.65	0.0505174	0.0624788	0.0531368		0.0553777	0.00628764
192.067	0.0505528	0.0619412	0.0529659		0.0551533	0.00600104
219.317	0.0509255	0.060997	0.0532445		0.0550557	0.00527437
240.9	0.0533817	0.0618057	0.0538772		0.0563549	0.00472707
267	0.0529683	0.0635041	0.0544972		0.0569899	0.00569305
292.167	0.0532084	0.0638398	0.0550893		0.0573792	0.00567356
315.417	0.0512397	0.0658375	0.0550872		0.0573881	0.00756603
339.483	0.0535011	0.0648077	0.0551094		0.057806	0.0061167
Tla2/Wt film
Time, h					AVG	STD
0	0	0	0		0	0
30.5333	0.00135482	0.00186466	0.00454857		0.00258935	0.00171578
49.0833	0.0272083	0.0226038	0.0292569		0.0263564	0.0034074
74.4833	0.0771792	0.0669396	0.0670681		0.0703956	0.0058751
100.133	0.125163	0.105071	0.0933171		0.10785	0.0161039
124.15	0.169416	0.138589	0.111175		0.139727	0.0291373
143.6	0.18481	0.153012	0.119624		0.152482	0.0325965
174.933	0.203124	0.15851	0.117042		0.159559	0.0430504
192.617	0.208448	0.1649	0.125625		0.166324	0.0414297
219.867	0.212536	0.167354	0.126549		0.168813	0.043012
241.267	0.223707	0.173767	0.132984		0.176819	0.0454382
267.433	0.230889	0.18354	0.135237		0.183222	0.0478267
292.667	0.230708	0.179557	0.134008		0.181424	0.0483767
315.733	0.234572	0.188739	0.135974		0.186428	0.0493392
339.883	0.232208	0.191091	0.138909		0.187403	0.0467586
Tla5/Tla2/Wt film
Time, h					AVG	STD
0	0	0	0		0	0
30.35	0.00052342	0.00290257	0.00266247		0.00202949	0.00130981
48.8833	0.00370953	0.00847152	0.00766419		0.00661508	0.00254845
74.2667	0.00879756	0.0209322	0.0181724		0.0159674	0.00636073
100	0.0203481	0.0476397	0.0370241		0.035004	0.0137575
124.017	0.0444738	0.0813737	0.0717922		0.0658799	0.0191473
143.367	0.0731317	0.106611	0.0988441		0.0928622	0.0175229
174.783	0.11477	0.151635	0.158069		0.141492	0.0233638
192.433	0.140463	0.177204	0.190857		0.169508	0.0260635
219.517	0.174014	0.213101	0.230897		0.206004	0.0290981
241.067	0.196523	0.242135	0.268024		0.23556	0.0362008
267.167	0.220603	0.257419	0.292922		0.256981	0.0361616
292.45	0.238216	0.265075	0.303626		0.268973	0.0328788
315.583	0.254849	0.285915	0.320938		0.287234	0.0330645
339.617	0.272758	0.295483	0.332497		0.300246	0.0301532
