# Supplementary material for: Engineered biocatalytic architecture for enhanced light utilisation in algal H 2 production
Source: Royal Society of Chemistry journal article supplement (doi:10.1039/d4ee03075c), 2024-12-11
Supplement: d4ee03075c2.pdf [file d4ee03075c2.pdf]

Electronic Supplementary Material (ESI) for Sustainable Energy & Fuels  
This journal is © The Royal Society of Chemistry 2022

## **Engineered biocatalytic architecture for enhanced light utilisation in algal H<sub>2</sub> production**

Sergey Kosourov,<sup>\*a</sup> Tekla Tammelin<sup>b</sup> and Yagut Allahverdiyeva<sup>\*a</sup>

<sup>a</sup> Molecular Plant Biology, Department of Life Technologies, University of Turku, FI-20014 Turku, Finland;

<sup>b</sup> VTT Technical Research Centre of Finland Ltd, VTT, PO Box 1000, FI-02044 Espoo, Finland.

The data supporting this article are available in the file: Data.xlsx

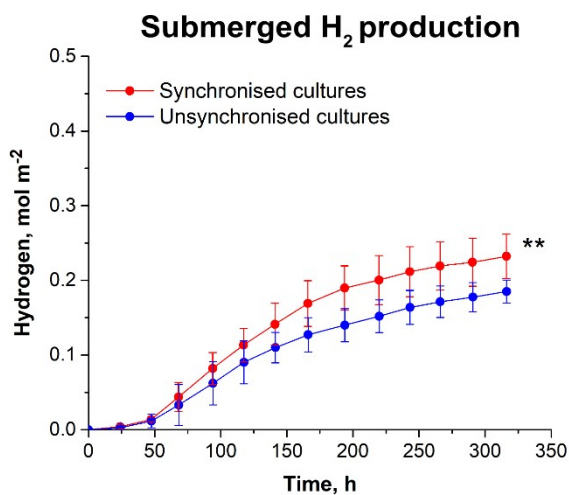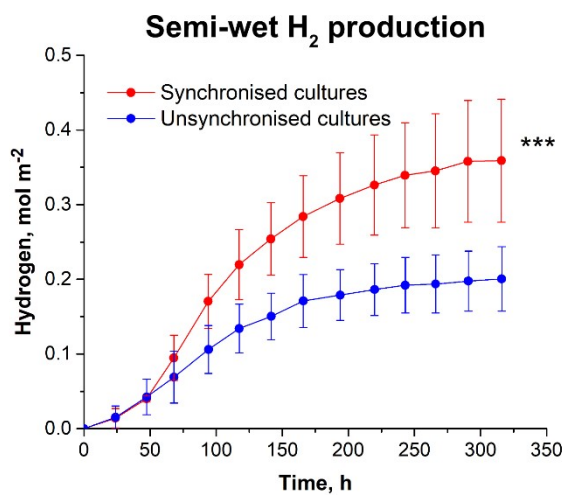

Suppl. Fig. 1 Effect of production conditions and cell cycle synchronisation on long-term H<sub>2</sub> photoproduction by S-deprived *C. reinhardtii* cells entrapped within single-layer Ca<sup>2+</sup>-alginate films. Differences are significant at \*\*,  $P < 0.01$  and \*\*\*,  $P < 0.001$ .

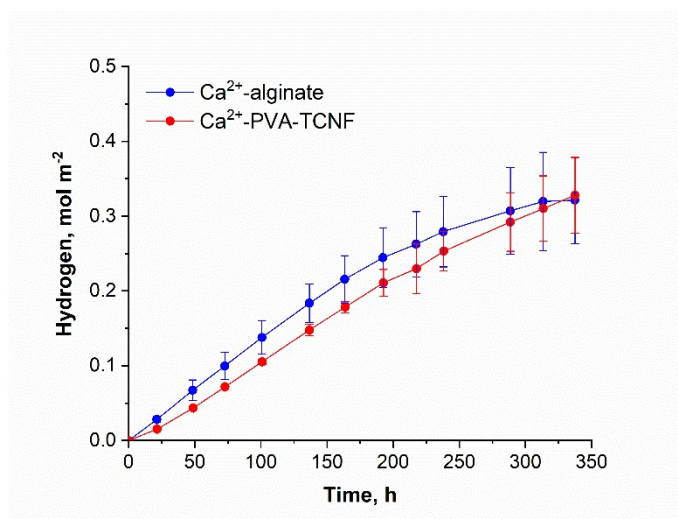

Suppl. Fig. 2 Comparison of H<sub>2</sub> photoproduction yields by single-layer Ca<sup>2+</sup>-alginate and Ca<sup>2+</sup>-PVA-TCNF films under semi-wet production conditions.

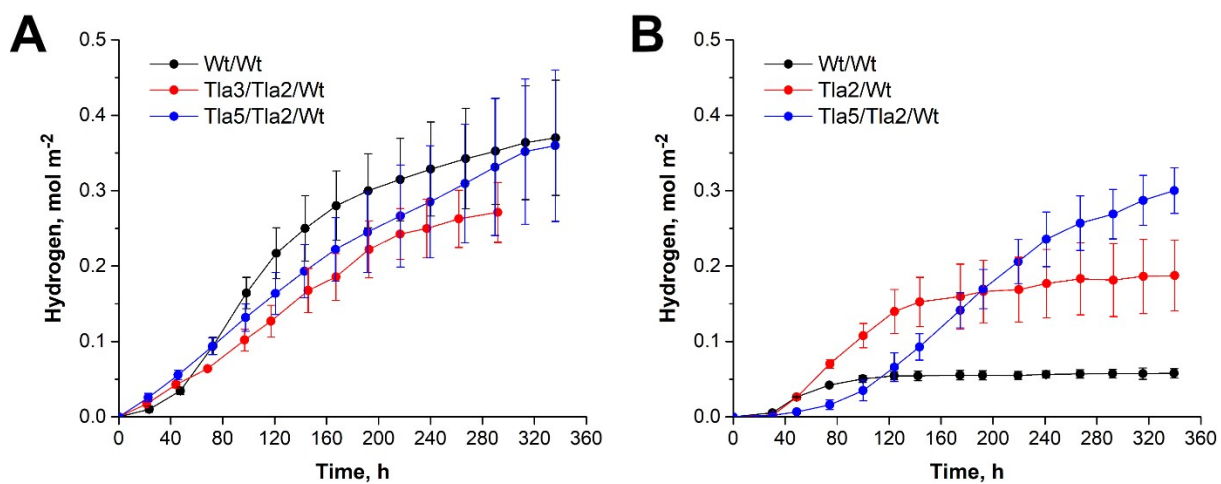

Suppl. Fig. 3 Hydrogen photoproduction by Ca<sup>2+</sup>-PVA-TCNF films with double- and triple-layer architecture exposed to 25 (A) and 200 (B) μmol photons m<sup>-2</sup> s<sup>-1</sup> light under semi-wet production conditions. The double-layer films consist of two 120 μm-thick layers, while triple-layer films consist of three 80 μm-thick layers.
